# Supplementary material for: Structure, Physicochemical Properties and Biological Activity of Lipopolysaccharide from the Rhizospheric Bacterium Ochrobactrum quorumnocens T1Kr02, Containing d-Fucose Residues
Source: Int J Mol Sci. 2024 Feb 6;25(4):1970. doi: 10.3390/ijms25041970 (PMC10888714; doi:10.3390/ijms25041970)
Supplement: Supplementary file 1 [file ijms-25-01970-s001.zip › ijms-2852926-supplementary.pdf]

## Supplemental Materials

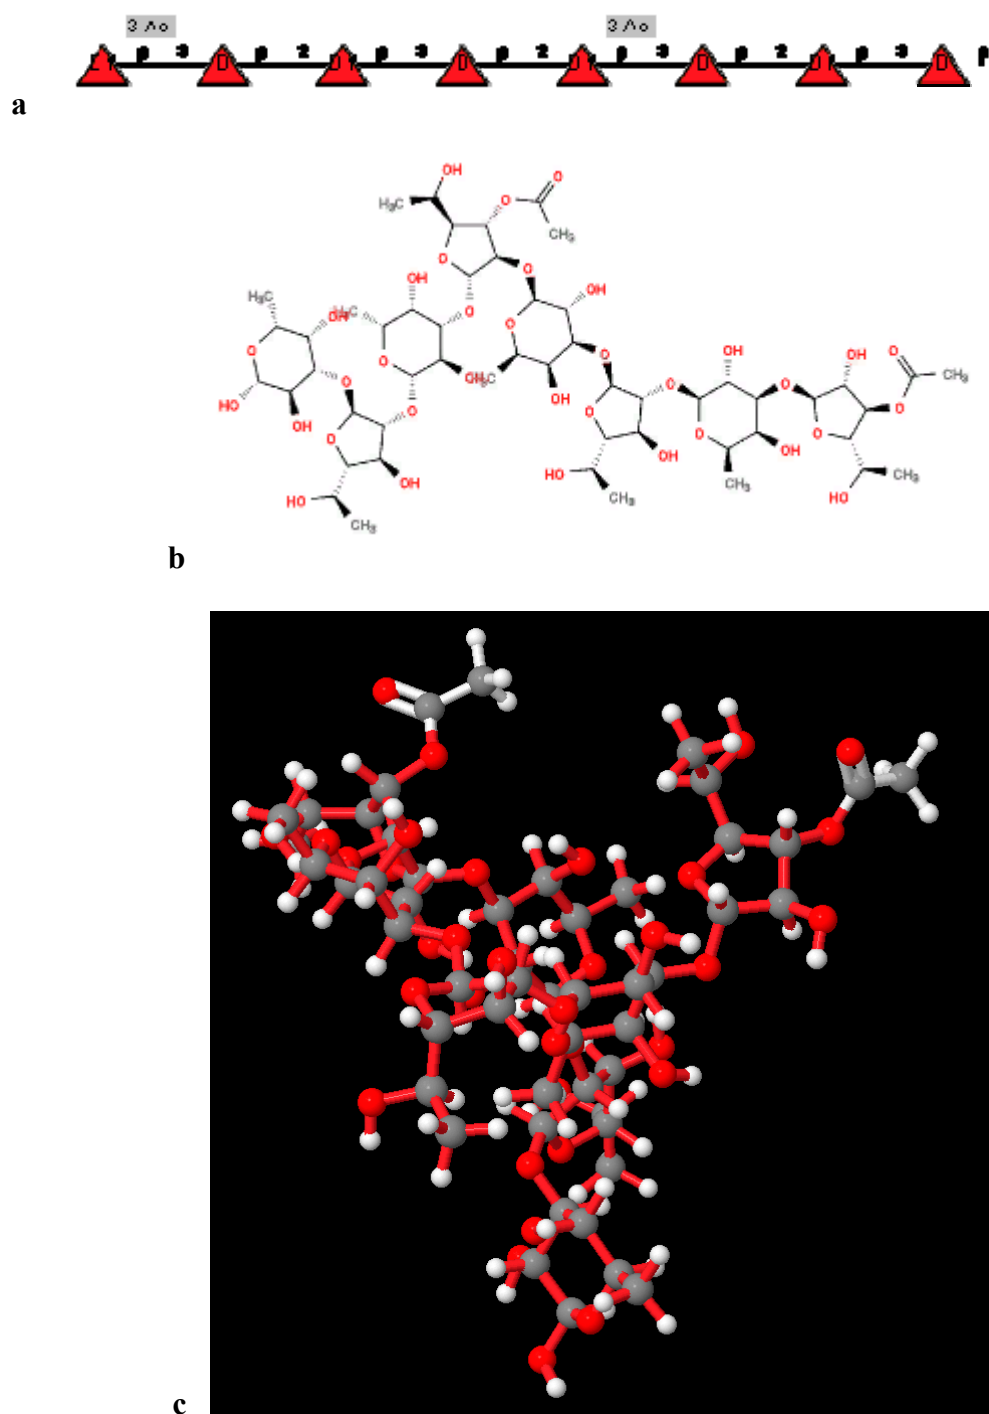

**Figure S1.** Schematic (a) and structure (b) formulas, and molecular model (c) of PS-1 from *O. quorumnogens* T1Kr02, containing four repeating units  $\rightarrow 2$ - $\beta$ -D-Fucp-(1 $\rightarrow$ 3)- $\beta$ -D-Fucp-(1 $\rightarrow$ ).

50% of the D-Fucp residues (in the second and fourth units) at position 3 are O acetylated.

Atoms (balls) are designated as follows: gray – carbon; red – oxygen; white – hydrogen. Bonds between atoms in the oligosaccharide are indicated by red sticks, and bonds in the acetyl group are indicated by white sticks.

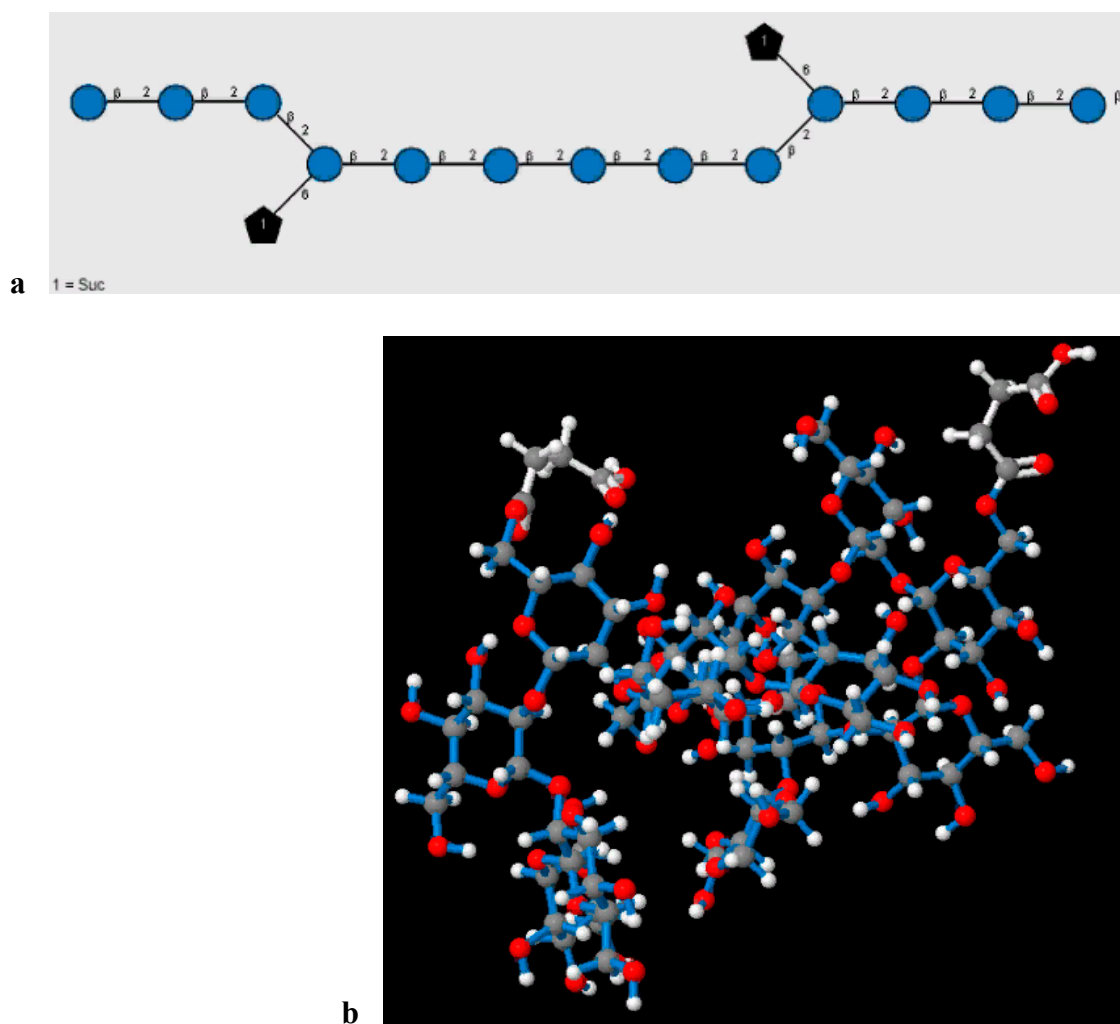

**Figure S2.** Schematic formula (**a**) and molecular model (**b**) of PS-2 from *O. quorumnogens* T1Kr02, containing thirteen repeating units  $\rightarrow 2$ - $\beta$ -D-Glcp-(1 $\rightarrow$ ).

Two residues of the D-Glcp (~15%) at position 6 are linked with a succinate residue.

Atoms (balls) are designated as follows: gray – carbon; red – oxygen; white – hydrogen. Bonds between atoms in the oligosaccharide are indicated by blue sticks, and bonds in the succinate group are indicated by white sticks.

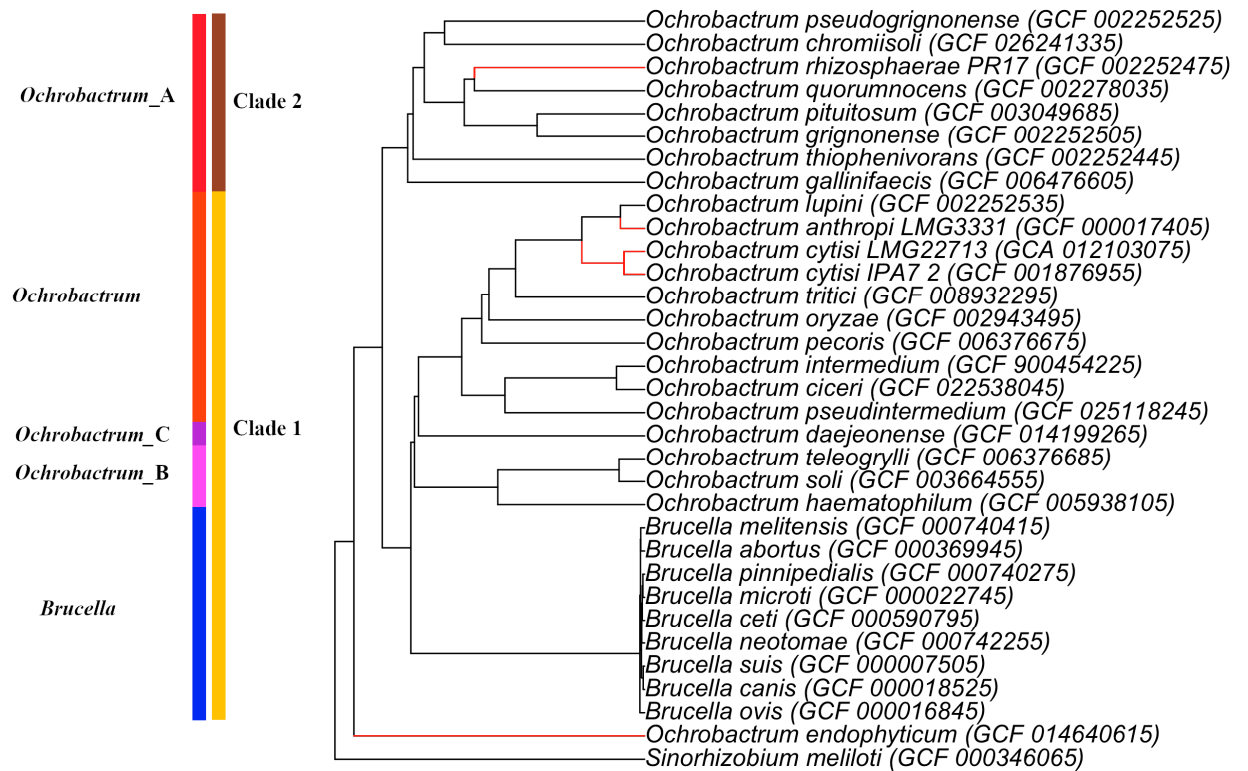

**Figure S3.** Phylogenetic tree (UPGMA) of bacteria belonging to the genera *Brucella* and *Ochrobactrum* (*Brucella/Ochrobactrum* group) based on average nucleotide identity (ANI).

The division of species into Clade 1 and Clade 2 is given in accordance with Leclercq et al. (2020); the division into groups *Brucella*, *Ochrobactrum*, *Ochrobactrum\_A*, *Ochrobactrum\_B*, and *Ochrobactrum\_C* is given in accordance with GTDB-Tk data ([https://github.com/kbaseapps/kb\\_gtdbtk](https://github.com/kbaseapps/kb_gtdbtk)).

The red branches on the phylogenetic tree show strains of the genus *Ochrobactrum* for which the O-polysaccharide structures have been previously described.

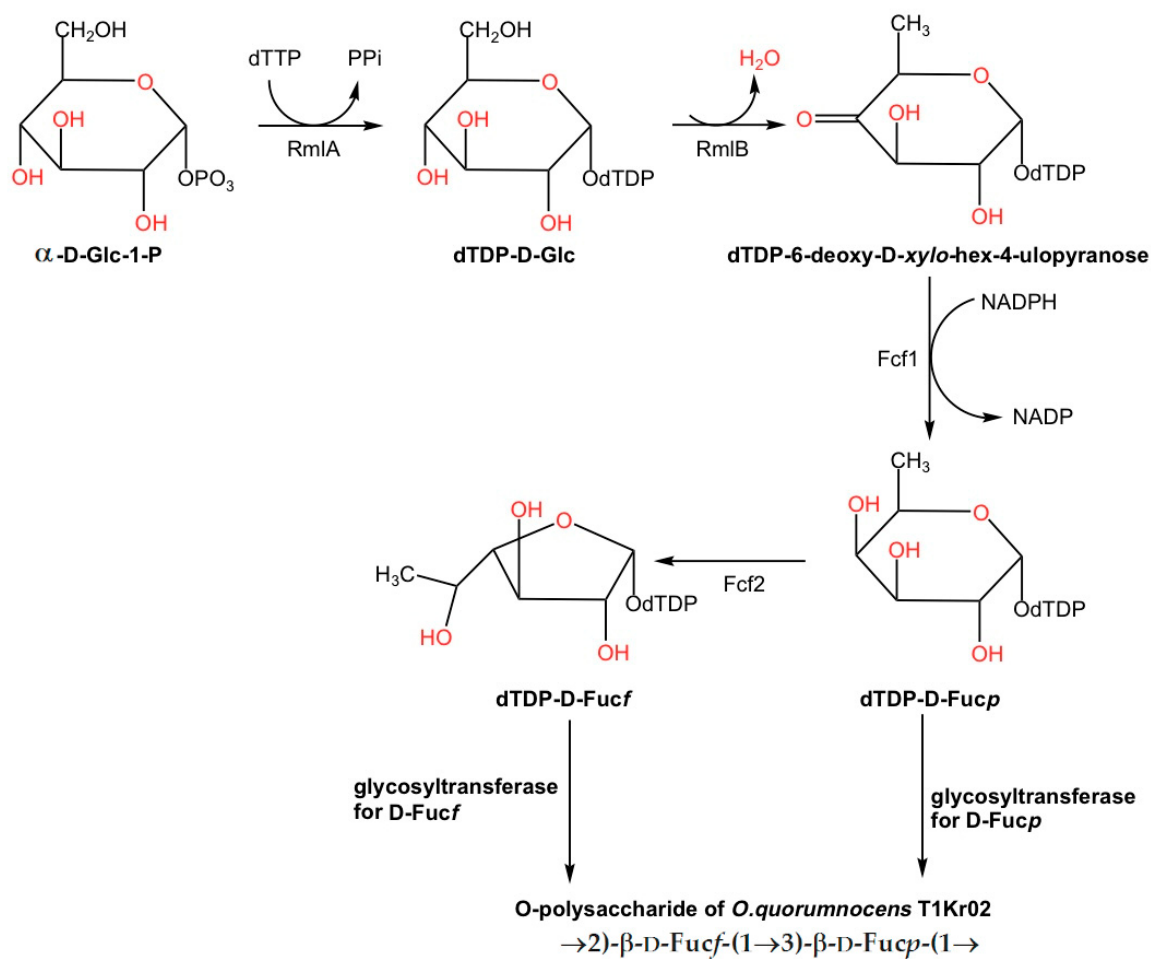

**Figure S4.** The putative biosynthesis pathway of nucleotide-activated residues of D-fucopyranose and D-fucofuranose for the O-polysaccharide of *Ochrobactrum quorumnecens* T1Kr02.

**RmlA** (EC 2.7.7.24) – glucose-1-phosphate thymidyltransferase;

**RmlB** (EC 4.2.1.46) – dTDP-glucose 4,6-dehydratase;

**Fcf1** (EC 1.1.1.266) – dTDP-4-dehydro-6-deoxyglucose reductase;

**Fcf2** (EC 5.4.99.59) – dTDP-fucopyranose mutase.

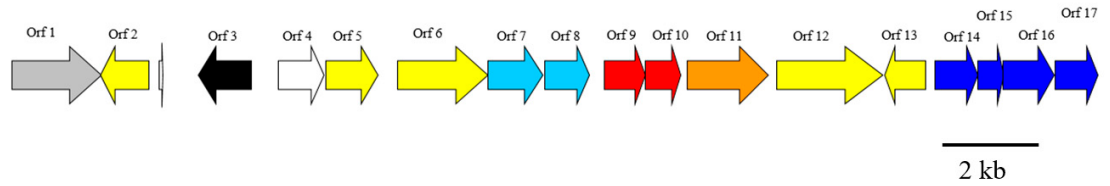

**Figure S5.** O-antigen biosynthesis gene cluster in the genome of the *Ochrobactrum quorumnecens* strain RPTAtOch1 (acc. number VYXQ01000001), phylogenetically close to the *Ochrobactrum quorumnecens* strain T1Kr02.

Red arrows: genes of the O-polysaccharide processing *wzm* (Orf9) and *wzt* (Orf10); yellow arrows: glycosyltransferase genes; blue arrows: genes for the biosynthesis of dTDP-L-rhamnose – *rmlA* (Orf14), *rmlB* (Orf16), *rmlC* (Orf15), and *rmlD* (Orf17); blue arrows: genes for the biosynthesis of dTDP-D-fucopyranose (*fcf1*, Orf 8) and dTDP-D-fucofuranose (*fcf2*, Orf7); orange arrow: gene of methyltransferase *wbeT* (Orf11); black arrow: gene of acetyltransferase; gray arrow: *wzd* gene involved in initiation of repeat unit biosynthesis.

The biosynthesis of dTDP-D-fucopyranose (Fig. S4) requires the functioning of the enzymes RmlA (Orf14), RmlB (Orf16), and Fcf1 (Orf8). The biosynthesis of dTDP-D-fucopyranose additionally requires the enzyme Fcf2 (Orf7).

The glycosyltransferase (Orf6) and *fcf2* (Orf7) genes have an overlap of 1 bp, which indicates the functional connectivity of the products of these genes. Presumably, Orf6 is a glycosyltransferase that adds D-fucopyranose residues to the O-polysaccharide repeat unit.
